# Supplementary material
Source: PubMed Central journal article supplement (PMC8432375)
Supplement: NIHMS1731156-supplement-1.pdf [file NIHMS1731156-supplement-1.pdf]

## Supplemental Tables Legends

**Table 1.** Antibody suppliers and working dilutions.

**Table 2.** Primer sequences to generate GAPDH mutants via site-directed mutagenesis.

Journal Pre-proof

**Table 1**

| Antigen                     | Dilution    | Type       | Order # | RRID        | Supplier            |
|-----------------------------|-------------|------------|---------|-------------|---------------------|
| GAPDH                       | WB - 1:1000 | monoclonal | 2118    | AB_561053   | Cell Signaling      |
| $\beta$ -Tubulin            | WB - 1:1000 | monoclonal | 2128    | AB_823664   | Cell Signaling      |
| Anti-HA                     | WB - 1:1000 | monoclonal | 3724    | AB_1549585  | Cell Signaling      |
| p53                         | WB - 1:1000 | monoclonal | 2524    | AB_331743   | Cell Signaling      |
| Ac-p53                      | WB - 1:1000 | monoclonal | 2525    | AB_330083   | Cell Signaling      |
| SirT1                       | WB - 1:1000 | polyclonal | 15404   | AB_2188346  | Santa Cruz          |
| SirT1                       | WB - 1:1000 | monoclonal | 110304  | AB_10864359 | Abcam               |
| Glrx                        | WB - 1:1000 | monoclonal | 11545   | n/a         | Cayman              |
| HDAC1                       | WB - 1:1000 | monoclonal | 34589   | AB_2756821  | Cell Signaling      |
| Cleaved Caspase-3           | WB - 1:1000 | polyclonal | 9661    | AB_2341188  | Cell Signaling      |
| HA-Tag magnetic beads       | n/a         | monoclonal | 11846S  |             | Cell Signaling      |
| Streptavidin magnetic Beads | n/a         | n/a        | S1420S  |             | New England BioLabs |

**Table 2**

| Mutation Position     | Sequence                                  |
|-----------------------|-------------------------------------------|
| C152S forward         | 5'-CAGCAATGCCTCCTCCACCACCAACTGCT-3'       |
| C152S reverse         | 5'-AGCAGTTGGTGGTGGAGGAGGCATTGCTG-3'       |
| C156S forward         | 5'-CTGCACCACCAACTCCTTAGCACCCCTGG-3        |
| C156S reverse         | 5'-CCAGGGGTGCTAAGGAGTTGGTGGTGCAG-3'       |
| C152S & C156S forward | 5'-GCAATGCCTCCTCCACCACCAACTCCTTAGCACCC-3' |
| C152S & C156S reverse | 5'-GGTGCTAAGGAGTTGGTGGTGGAGGAGGCATTG-3'   |
| C247S forward         | 5'-AGTGGTGGACCTGACCTCCCGTCTAGAAAAAC-3'    |
| C247S reverse         | 5'-GTTTTTCTAGACGGGAGGTCAGGTCCACCACT-3'    |
